# Supplementary material for: Parvalbumin Neurons in Zona Incerta Regulate Itch in Mice
Source: PubMed Central journal article supplement (PMC8920991; doi:10.3389/fnmol.2022.843754), 2022-03-01
Supplement: Image_1.pdf [file Image_1.pdf]

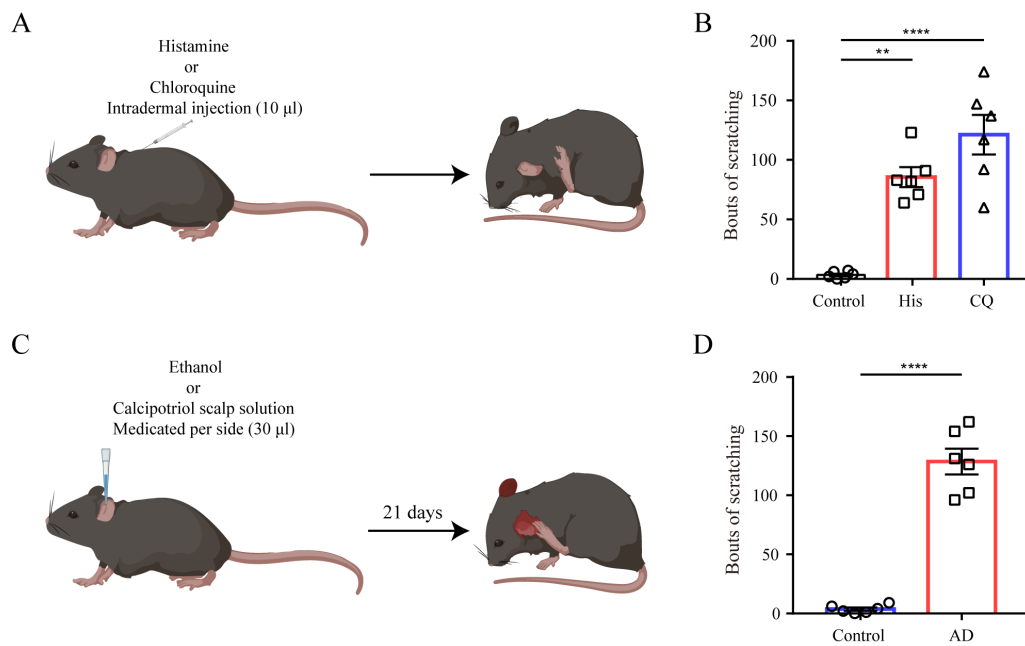

**Supplemental Figure 1:** (A) Schematic of the establishment of histamine and chloroquine induced acute itch models. (B) Intradermal injections of histamine and chloroquine induce robust scratching behavior in mice. Kruskal-Wallis test and Nemenyi multiple comparisons tests.  $\chi^2=12.538$ ,  $P=0.002$ .  $n=6$  mice in each group. (C) Schematic of the establishment of atopic dermatitis (AD) induced chronic itch model. (D) Consecutive topical application of calcipotriol induces robust scratching behavior in mice. Unpaired T test.  $t=-11.394$ ,  $P<0.001$ .  $n=6$  mice in each group. \*\*\*\* $P<0.0001$ , \*\*\* $P<0.001$ , \*\* $P<0.01$ .

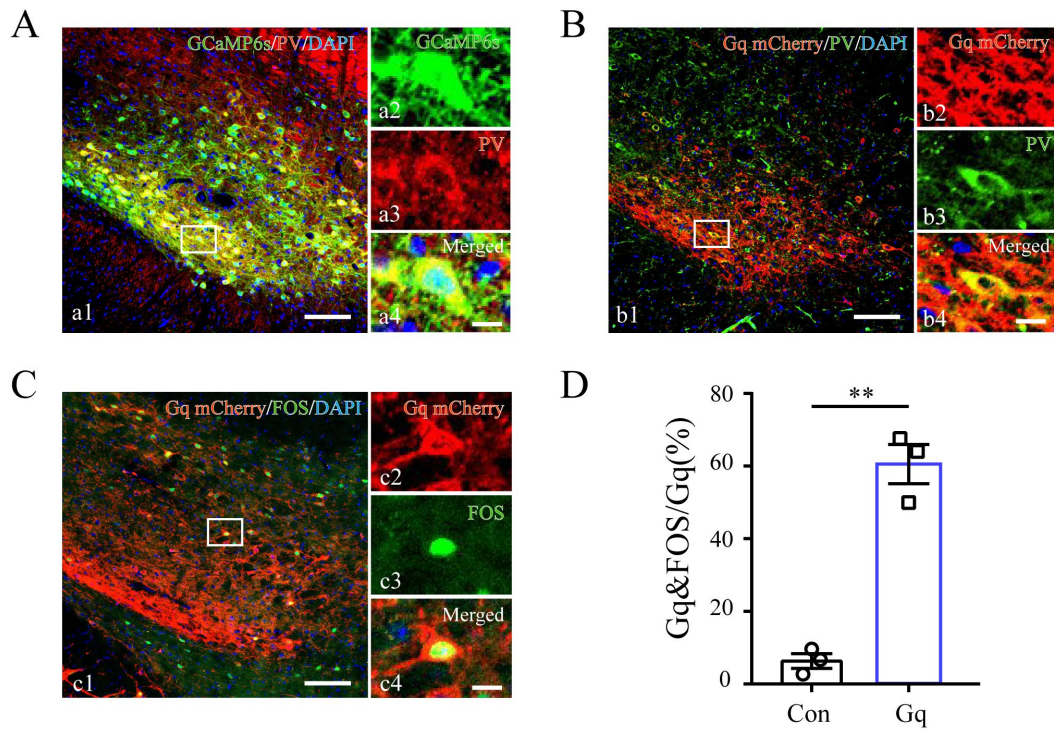

**Supplemental Figure 2:** (A) Representative photographs showing the expression of PV (red) in GCaMP6s-positive (green) neurons in the ZI of PV-Cre mice with atopic dermatitis. (B) Representative photographs showing the expression of PV (green) in Gq mCherry-positive (red) neurons in the ZI of PV-Cre mice with atopic dermatitis. (C) Representative photographs showing the expression of FOS (green) in hM3Dq-positive (red) neurons in the ZI of PV-Cre mice with atopic dermatitis. (D) Quantification of FOS-expressing neurons in mice with AAV-hM3Dq and AAV-mCherry injection showed CNO injection increased FOS expression in ZI PV neurons in atopic dermatitis mice of AAV-hM3Dq group.  $n = 3$  mice per group, 3 sections per mouse. Unpaired T test.  $t = -9.433$ ,  $P = 0.001$ . The framed area in a1, b1, and c1 was magnified in a2-4, b2-4, and c2-4, respectively. Scale bars represent 100  $\mu\text{m}$  in a1, b1, and c1, and 50  $\mu\text{m}$  in a2-4, b2-4, and c2-4.  $**P < 0.01$ .
